CORRECTION

## Correction: How University students in Bangladesh engage with ChatGPT: A qualitative study

Mir Hasib, Md. Shariful Islam

There is an error in affiliation 2 for author Md. Shariful Islam. The correct affiliation 2 is: Mass Communication and Journalism Discipline, Social Science School, Khulna University, Khulna, Bangladesh.

### Reference

1. Hasib M, Islam MS. How University students in Bangladesh engage with ChatGPT: A qualitative study. PLoS One. 2025;20(9):e0333089. <https://doi.org/10.1371/journal.pone.0333089> PMID: [40986478](https://pubmed.ncbi.nlm.nih.gov/40986478/)

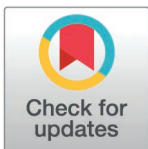

### OPEN ACCESS

**Citation:** Hasib M, Islam MS (2026) Correction: How University students in Bangladesh engage with ChatGPT: A qualitative study. PLoS One 21(3): e0344589. <https://doi.org/10.1371/journal.pone.0344589>

**Published:** March 9, 2026

**Copyright:** © 2026 Hasib, Islam. This is an open access article distributed under the terms of the [Creative Commons Attribution License](https://creativecommons.org/licenses/by/4.0/), which permits unrestricted use, distribution, and reproduction in any medium, provided the original author and source are credited.
